# Supplementary material for: Tungsten disulfide-reduced GO/CNT aerogel: a tuned interlayer spacing anode for efficient water desalination
Source: Royal Society of Chemistry journal article supplement (doi:10.1039/d1ta01347e), 2021-01-01
Supplement: d1ta01347e1.pdf [file d1ta01347e1.pdf]

## Tungsten Disulfide-reduced GO/CNT Aerogel: A Tuned Interlayer Spacing Anode for Efficient Water Desalination

Sareh Vafakhah<sup>a</sup>, Mohsen Saeedikhani<sup>b</sup>, Shaozhuan Huang<sup>c</sup>, Dong Yan<sup>a</sup>, Zhi Yi Leong<sup>a</sup>, Ye Wang<sup>d</sup>, Lijuan Hou<sup>d</sup>, Lu Guo<sup>a,\*</sup>, Pablo Valdivia y Alvarado<sup>a</sup>, Hui Ying Yang<sup>a,\*</sup>

<sup>a</sup> Pillar of Engineering Product Development, Singapore University of Technology and Design, Singapore 487372

<sup>b</sup> Department of Materials Science and Engineering, National University of Singapore, 9 Engineering Drive 1, Singapore 117576

<sup>c</sup> Key Laboratory of Catalysis and Energy Materials Chemistry of Ministry of Education, South-Central University for Nationalities, Wuhan, Hubei, 430074, China

<sup>d</sup> Key Laboratory of Material Physics, Ministry of Education, School of Physics and Microelectronics, Zhengzhou University, Zhengzhou, 450052, China

\*Corresponding Author

Email: yanghuiying@sutd.edu.sg, lu\_guo@sutd.edu.sg

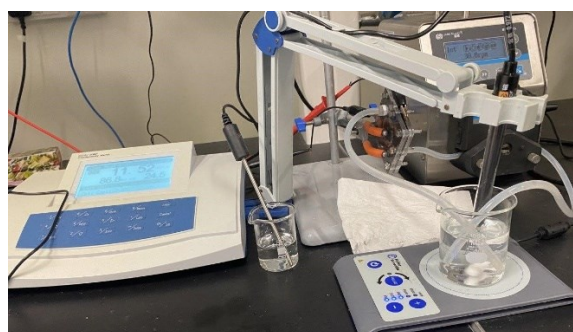

Figure S1, photograph of HCDI set up.

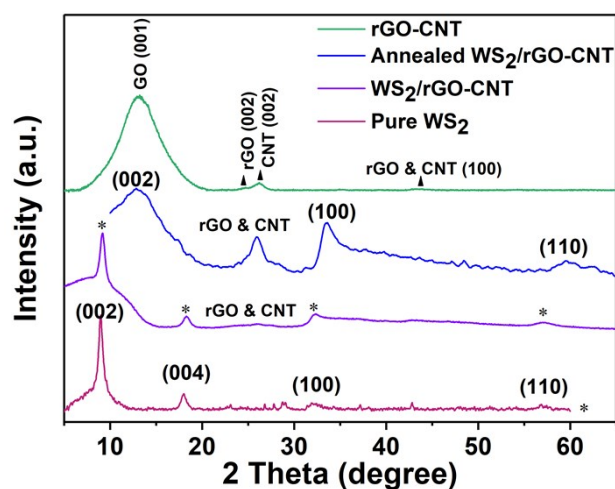

Figure S2, XRD pattern of rGO-CNT.

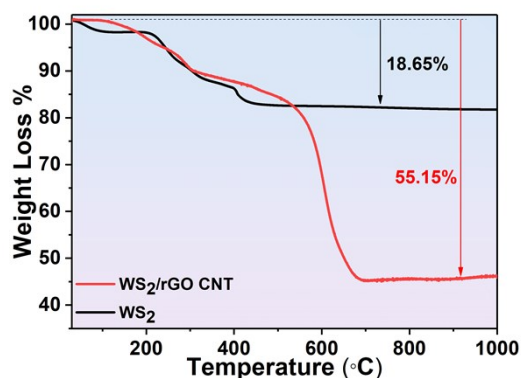

**Figure S3**, TGA analysis to determine the amount of WS<sub>2</sub> in WS<sub>2</sub>/rGO-CNT composite

In order to calculate the percentage of WS<sub>2</sub> and rGO-CNT in the composite, TGA experiments were performed for both WS<sub>2</sub>/rGO-CNT aerogel and pure WS<sub>2</sub> as a reference sample. Therefore, the WS<sub>2</sub> content can be calculated using below equation, meaning the residual amount for both samples at 800 °C have the same compositions:

$$\frac{(1 - 18.65\%) \text{wt}\%_{\text{WS}_2}}{\text{wt}\%_{\text{rGO-CNT}} + \text{wt}\%_{\text{WS}_2}} = (1 - 55.15\%)$$

$$\text{wt}\%_{\text{WS}_2} = 55.13\%$$

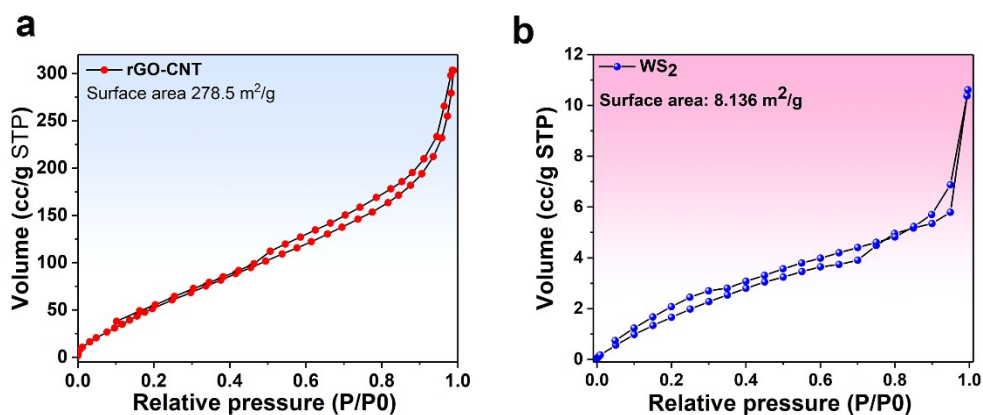

**Figure S4**, BET nitrogen adsorption-desorption isotherm, a) of rGO-CNT, and b) pure WS<sub>2</sub> powder.

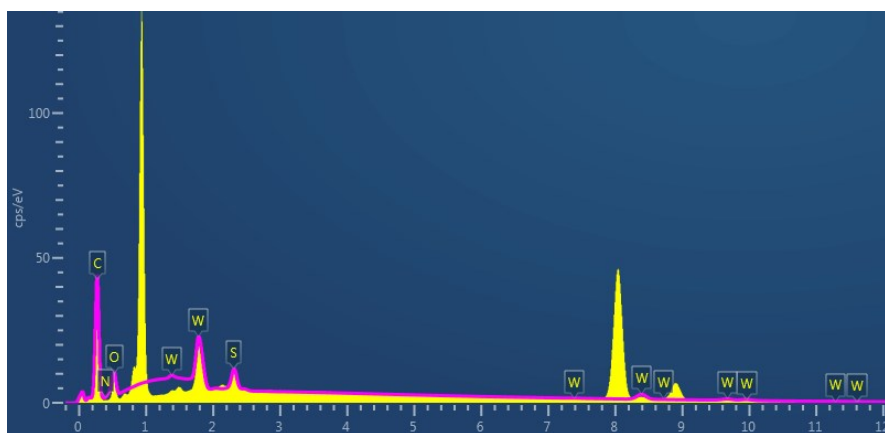

**Figure S5**, the elemental analysis of WS<sub>2</sub>/rGO-CNT with EDS, indicating the atomic ratio of W to S as ~ 1:1.7 (0.3 atomic positions are occupied with oxygen content). The excess peaks are related to the copper substrate.

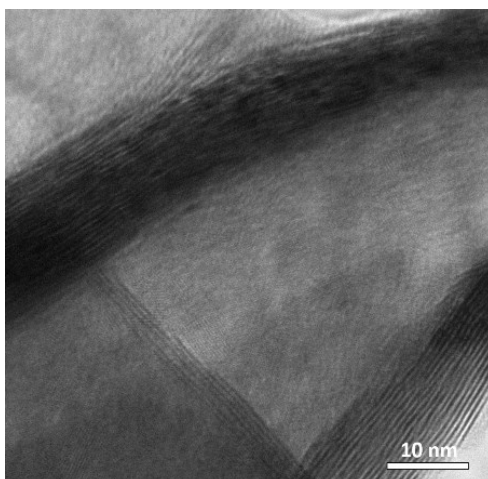

**Figure S6**, the HRTEM image for annealed WS<sub>2</sub>/rGO-CNT indicating the interlayer spacing of 0.62 nm between (002) planes.

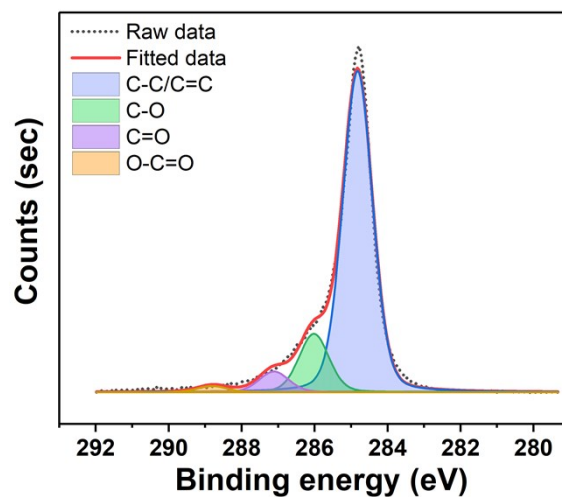

Figure S7, The C1s spectra for nonannealed WS<sub>2</sub>/rGO-CNT.

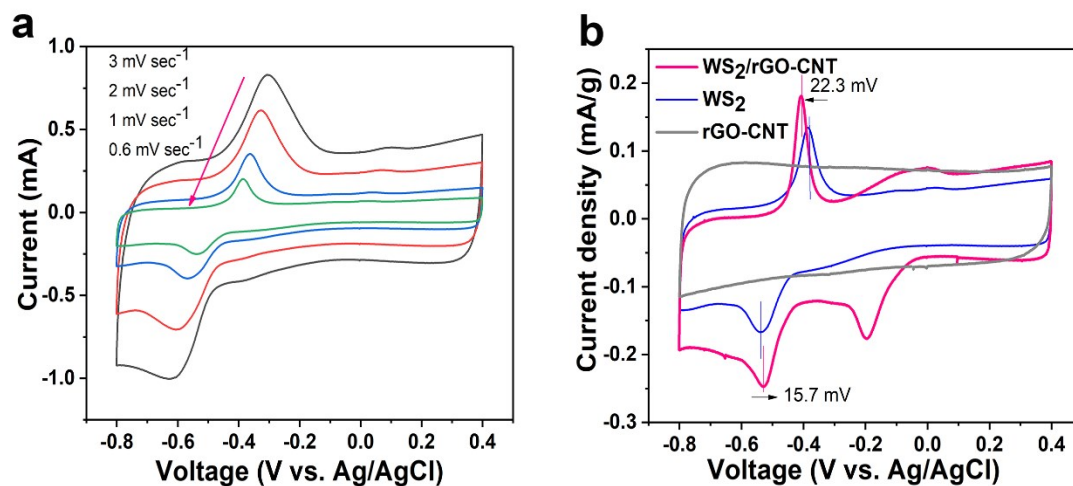

Figure S8, a) the Cyclic voltammetry of pure WS<sub>2</sub> at different scan rates of 0.6, 1, 2 and 3 mV sec<sup>-1</sup>, and b) the comparison of pure WS<sub>2</sub>, bare rGO-CNT, and WS<sub>2</sub>/rGO-CNT at scan rate of 0.6 mV sec<sup>-1</sup>.

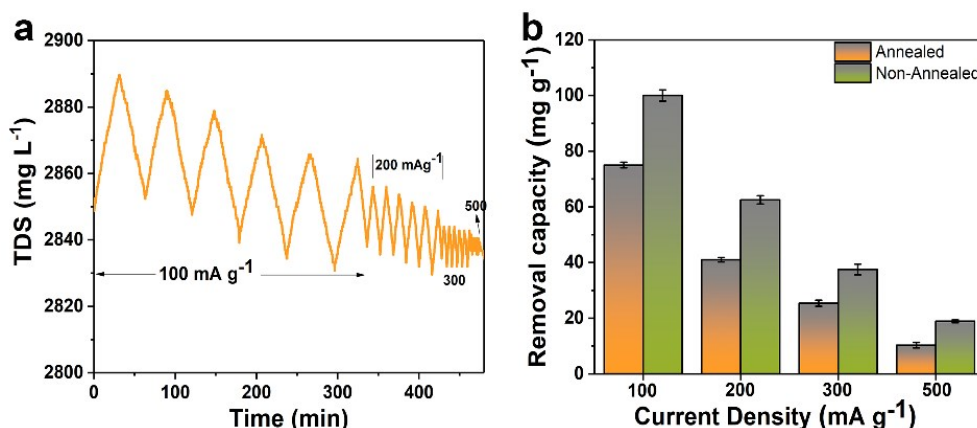

**Figure S9**, Desalination results for annealed WS<sub>2</sub>/rGO-CNT with total mass loading of 20 mg, the voltage range of -1.4 V to 1.4 V and flow rate of 50 mL/min, a) The TDS pattern at different current densities, and b) the comparison of removal capacity between annealed and nonannealed WS<sub>2</sub>/rGO-CNT.

**Table S1**, Desalination performances of recent transition Metal Dichalcogenides (TMDs) applied in CDI systems in comparison with the present work.

| Material                 | CDI mode         | Cell vol/Current density | NaCl (mM) | Electrodes mass (mg) | SAC (mg/g) | Energy                 | Ref       |
|--------------------------|------------------|--------------------------|-----------|----------------------|------------|------------------------|-----------|
| MoS <sub>2</sub> /CNT    | Symmetric CDI-CV | 0-0.8 V/-                | 500       | 80-120               | 25         | -                      | 21        |
| SnS <sub>2</sub> @GP     | Symmetric CDI-CV | 1.2 V/-                  | 8.5       | 60                   | 30.32      | -                      | 22        |
| MoS <sub>2</sub>         | CDI- CV          | 1.2 V/-                  | 400       | -                    | 8.81       | -                      | 52        |
| TiS <sub>2</sub> /CNT    | HCEDI- CV        | 0.2-0.8 V/-              | 600       | 300-330              | 14         | 1.2 Wh/L               | 20        |
| MoS <sub>2</sub> /GO     | MCDI- CV         | 1.4 V/-                  | 5.13      | -                    | 34.2       | -                      | 18        |
| MoS <sub>2</sub> /GO     | CDI- CV          | 1.2 V/-                  | 8.5       | -                    | 19.4       | -                      | 19        |
| WS <sub>2</sub> /rGO-CNT | HCEDI- CC        | 1.4 V/25 mA/g            | 51.3      | 80                   | 80         | 55.7 wh/m <sup>3</sup> | This work |

**Table 2**, Sodium ion removal results for large scale HCEDI device with total electrodes' masses of 80 mg at different current of 10 mA, 3 mA, and 1 mA at synthetic seawater solution with initial concentration of 35 g/L of mixed ions and initial sodium ion concentration of  $\approx$  8 g/L.

| Current (mA) | Salt removal, $\Delta C$ (mg/L) | Salt removal percentage (%) | Salt removal capacity (mmol/L) |
|--------------|---------------------------------|-----------------------------|--------------------------------|
| 10           | 190                             | 2.35                        | 8                              |
| 3            | 280                             | 3.62                        | 12                             |
| 1            | 580                             | 7                           | 25                             |

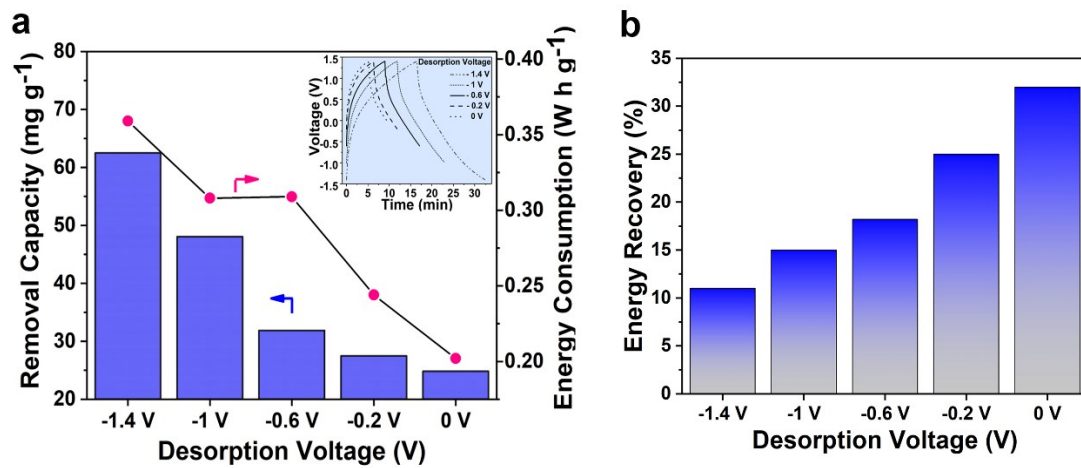

**Figure S10,** a) The removal capacity and energy consumption, and b) The percentage of energy recovery at different desorption voltages at 200 mA/g.
